# Supplementary material
Source: Royal Society of Chemistry journal article supplement (doi:10.1039/d6cp01055e)
Supplement: d6cp01055e1.pdf [file d6cp01055e1.pdf]

1 **Supplementary Material**

2 **P1-C<sub>7</sub>N<sub>4</sub>O<sub>8</sub>: Improved Stability and Energy Density via a**  
3 **Covalent Framework with Uniform Single Bonds**

4 Zhixiu Wang,<sup>a</sup> Yiqing Cao,<sup>b</sup> Jing Zhang<sup>a</sup>, Lei Zhao\*<sup>c</sup> and Wencai Yi\*<sup>b</sup>

5 <sup>a</sup> *Administrative Office of Laboratory and Equipment, Qufu Normal University, Qufu, 273165, China*

6 <sup>b</sup> *Key Laboratory of Quantum Materials under Extreme Conditions in Shandong Province, School of*  
7 *Physics and Physical Engineering, Qufu Normal University, Qufu 273165, China.*

8 <sup>c</sup> *College of Chemistry and Chemical Engineering, Southwest Petroleum University, Chengdu*  
9 *610500, P. R. China.*

10

11

12

13

14 **Table S1.** Crystal structure parameters of  $P1-C_7N_4O_8$  at 31 GPa.

| Structure                     | Lattice parameters                                                                                                                                     | Atomic coordinates            |
|-------------------------------|--------------------------------------------------------------------------------------------------------------------------------------------------------|-------------------------------|
| $P1-C_7N_4O_8$                | $a=4.083 \text{ \AA};$<br>$b=4.896 \text{ \AA};$<br>$c=6.602 \text{ \AA}$<br>$\alpha=68.430^\circ;$<br>$\beta=75.908^\circ;$<br>$\gamma=118.423^\circ$ | C1 0.318612 0.448583 0.513528 |
|                               |                                                                                                                                                        | C2 0.052831 0.109059 0.185609 |
|                               |                                                                                                                                                        | C3 0.513996 0.262853 0.856419 |
|                               |                                                                                                                                                        | C4 0.007646 0.503501 0.852760 |
|                               |                                                                                                                                                        | C5 0.267220 0.892712 0.655908 |
|                               |                                                                                                                                                        | C6 0.806848 0.182061 0.518609 |
|                               |                                                                                                                                                        | C7 0.551381 0.864422 0.180721 |
|                               |                                                                                                                                                        | N1 0.607084 0.370443 0.605619 |
|                               |                                                                                                                                                        | N2 0.117189 0.169214 0.583360 |
|                               |                                                                                                                                                        | N3 0.137121 0.639799 0.615371 |
|                               |                                                                                                                                                        | N4 0.159805 0.250576 0.947045 |
|                               |                                                                                                                                                        | O1 0.338543 0.040007 0.264617 |
|                               |                                                                                                                                                        | O2 0.119490 0.744713 0.890543 |
|                               |                                                                                                                                                        | O3 0.605325 0.975437 0.948186 |
|                               |                                                                                                                                                        | O4 0.401923 0.578454 0.275552 |
|                               |                                                                                                                                                        | O5 0.846990 0.849413 0.247330 |
| O6 0.662740 0.452763 0.928385 |                                                                                                                                                        |                               |
| O7 0.616580 0.909982 0.600995 |                                                                                                                                                        |                               |
| O8 0.886441 0.297441 0.279188 |                                                                                                                                                        |                               |

15

16 **Table S2.** Bond length and integrated crystal orbital Hamilton population (-ICOHP) of  $P1-C_7N_4O_8$  at 31 GPa and 0  
17 GPa.

| Chemical Bonds | 31 GPa          |             | 0 GPa           |             |
|----------------|-----------------|-------------|-----------------|-------------|
|                | Bond length (Å) | -ICOHP (eV) | Bond length (Å) | -ICOHP (eV) |
| N10-C1         | 1.449           | -11.348     | 1.479           | -10.793     |
| N10-C4         | 1.417           | -11.397     | 1.419           | -11.416     |
| N10-C5         | 1.488           | -10.070     | 1.569           | -8.262      |
| N11-C2         | 1.419           | -11.878     | 1.457           | -11.065     |
| N11-C3         | 1.416           | -12.057     | 1.446           | -11.393     |
| N11-C4         | 1.390           | -12.454     | 1.408           | -12.091     |
| N8-C1          | 1.443           | -11.306     | 1.478           | -10.738     |
| N8-C3          | 1.488           | -10.531     | 1.563           | -9.125      |
| N8-C6          | 1.418           | -12.072     | 1.453           | -11.461     |

|                    |       |         |       |         |
|--------------------|-------|---------|-------|---------|
| N9-C1              | 1.452 | -11.279 | 1.524 | -9.909  |
| N9-C5              | 1.451 | -11.370 | 1.507 | -10.365 |
| N9-C6              | 1.427 | -11.770 | 1.475 | -10.945 |
| O12-C2             | 1.384 | -12.286 | 1.400 | -11.930 |
| O12-C7             | 1.385 | -12.136 | 1.399 | -11.901 |
| O13-C4             | 1.391 | -11.404 | 1.414 | -10.730 |
| O13-C5             | 1.417 | -10.804 | 1.413 | -11.038 |
| O14-C3             | 1.404 | -11.821 | 1.430 | -11.233 |
| O14-C7             | 1.386 | -12.267 | 1.414 | -11.609 |
| O15-C1             | 1.412 | -11.479 | 1.436 | -11.005 |
| O15-C7             | 1.375 | -12.534 | 1.408 | -11.729 |
| O16-C2             | 1.392 | -11.895 | 1.413 | -11.433 |
| O16-C7             | 1.375 | -12.573 | 1.394 | -12.167 |
| O17-C3             | 1.387 | -11.981 | 1.398 | -11.898 |
| O17-C4             | 1.364 | -12.545 | 1.395 | -11.687 |
| O18-C5             | 1.378 | -12.677 | 1.406 | -12.028 |
| O18-C6             | 1.390 | -12.091 | 1.416 | -11.516 |
| O19-C2             | 1.382 | -12.484 | 1.410 | -11.867 |
| O19-C6             | 1.420 | -11.163 | 1.467 | -10.148 |
| Average value      | 1.410 | -11.774 | 1.443 | -11.124 |
| Standard deviation | 0.032 | 0.641   | 0.049 | 0.894   |

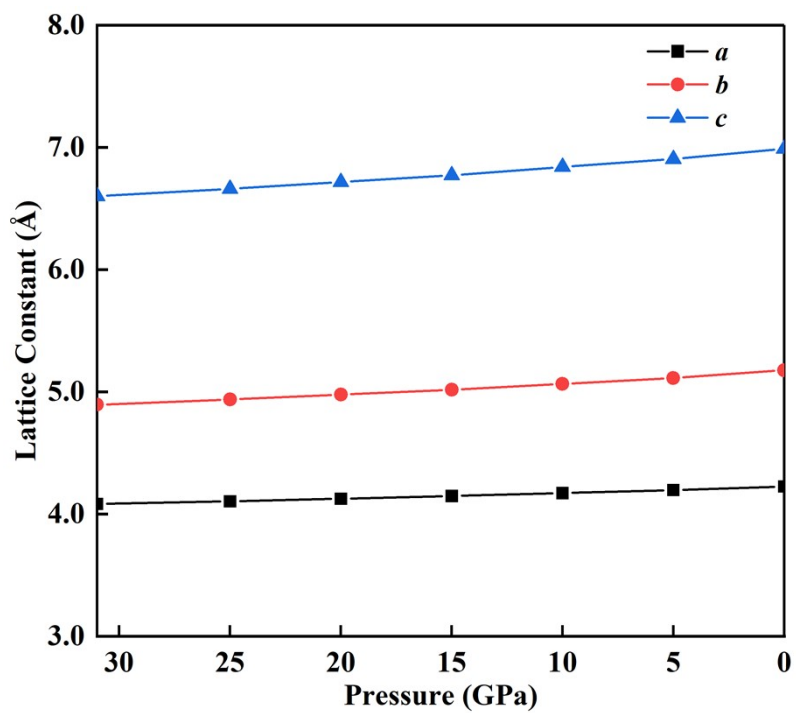

19

20 **Figure S1.** During releasing pressure from 31 GPa to ambient conditions, the change of lattice  
 21 constant of of P1-C<sub>7</sub>N<sub>4</sub>O<sub>8</sub>.

22
